# Supplementary figures and images for: IGFBP7 induces apoptosis of acute myeloid leukemia cells and synergizes with chemotherapy in suppression of leukemia cell survival
Source: PubMed Central journal article supplement — Cell Death Dis. 2014 Jun 26;5(6):e1300–. doi: 10.1038/cddis.2014.268 (PMC4611740; doi:10.1038/cddis.2014.268), 2014-06-26

# Supplementary figure S1

**A**

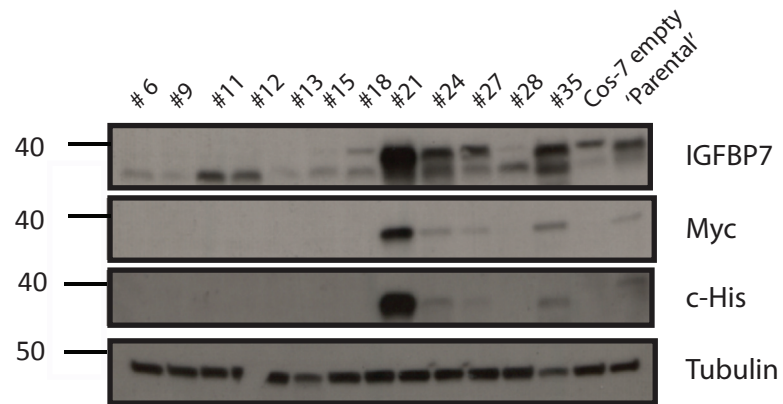

**B**

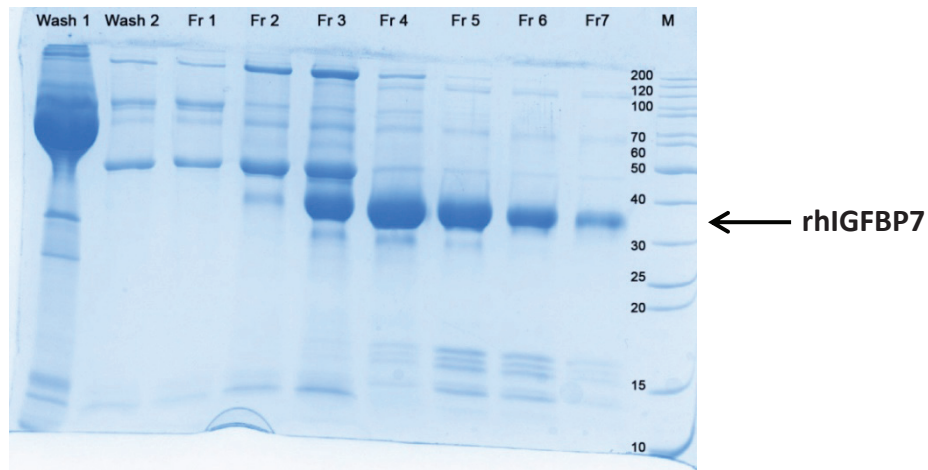

**C**

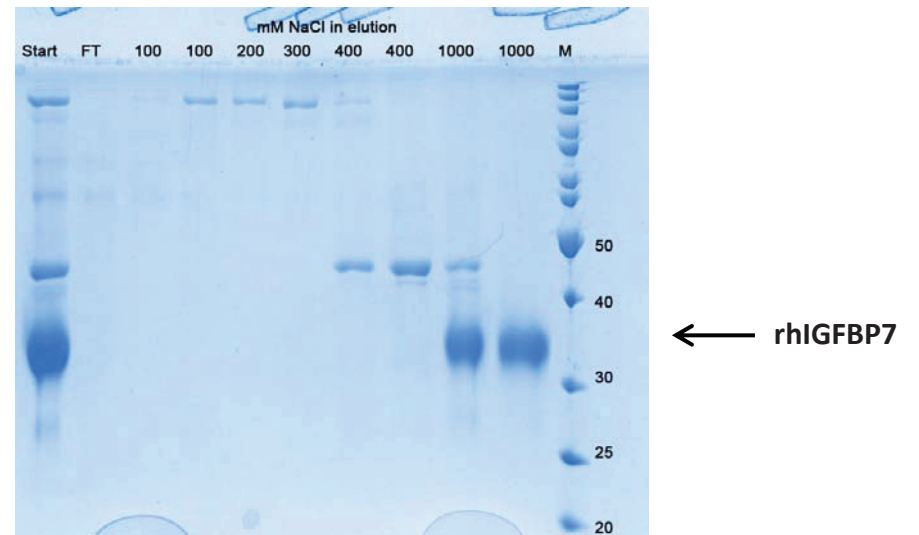

Supplement: cddis2014268x1.pdf [file cddis2014268x1.pdf]

# Supplementary figure S2

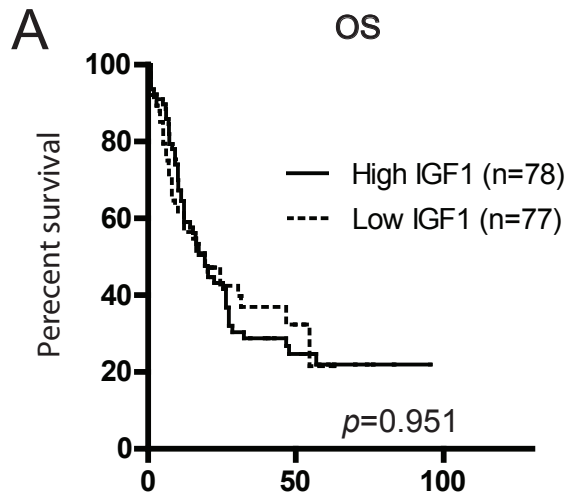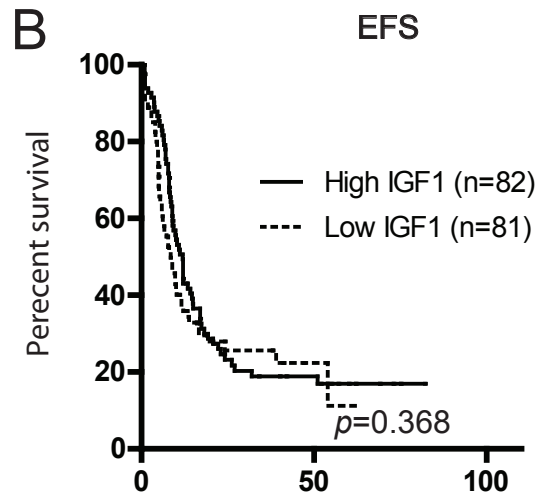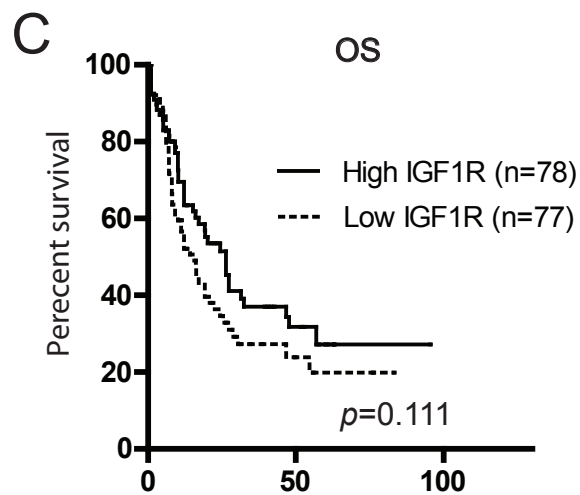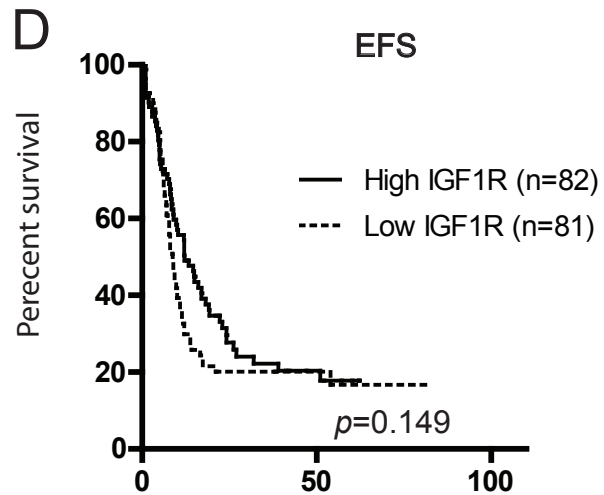

Supplement: cddis2014268x2.pdf [file cddis2014268x2.pdf]
